# Supplementary material for: The Effect of Chitosan on Plant Physiology, Wound Response, and Fruit Quality of Tomato
Source: MDPI journal article supplement (doi:10.3390/polym14225006), 2022-11-18
Supplement: s1 [file s1]

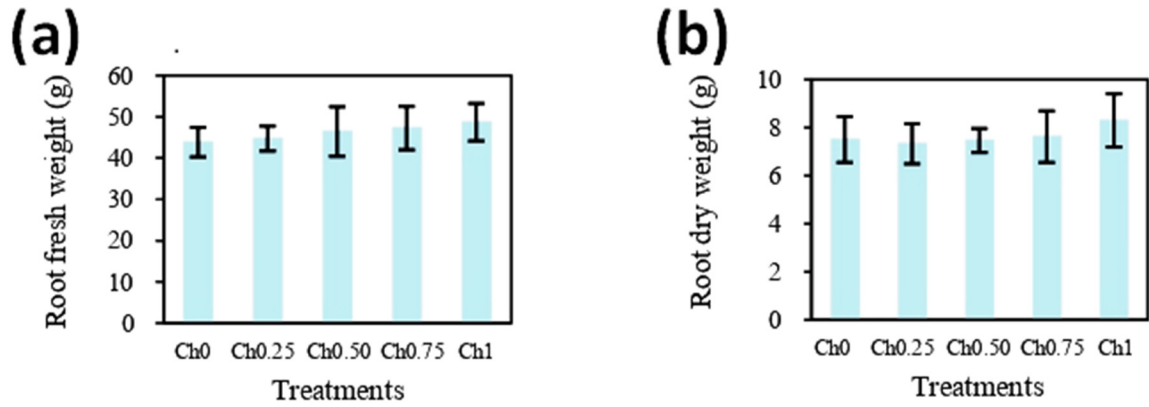

**Figure S1.** Effect of foliar spray with chitosan on root biomass (a,b) of tomato plants. Five treatments were applied until fruit ripening with 0 mg mL<sup>-1</sup> (Ch0), 0.25 mg mL<sup>-1</sup> (Ch0.25), 0.50 mg mL<sup>-1</sup> (Ch0.50), 0.75 mg mL<sup>-1</sup> (Ch0.75), and 1 mg mL<sup>-1</sup> (Ch1) chitosan, and four-month-old plants were analyzed. The results were expressed as the mean of 6 independent replicates  $\pm$  SD. There were no significant differences between treatments following one-way ANOVA (Duncan's multiple range,  $p \leq 0.05$ ).
